# Supplementary material for: Identification of key genes and pathways in scleral extracellular matrix remodeling in glaucoma: Potential therapeutic agents discovered using bioinformatics analysis
Source: PubMed Central journal article supplement (PMC7976561; doi:10.7150/ijms.52846), 2021-02-04
Supplement: ijmsv18p1554s1.pdf [file ijmsv18p1554s1.pdf]

Table S1. Detailed gene lists related with Glaucoma, Sclera and Extracellular matrix (ECM) remodeling from text mining.

| Glaucoma related genes | Sclera related genes | ECM remodeling related genes | Common genes   |
|------------------------|----------------------|------------------------------|----------------|
| <i>GSTM1</i>           | <i>NID1</i>          | <i>AKT3</i>                  | <i>NID1</i>    |
| <i>TAP2</i>            | <i>EPRS</i>          | <i>NID1</i>                  | <i>TGFB2</i>   |
| <i>LGALS8</i>          | <i>TGFB2</i>         | <i>ACTA1</i>                 | <i>HSD11B1</i> |
| <i>NID1</i>            | <i>PROX1</i>         | <i>PARP1</i>                 | <i>CD34</i>    |
| <i>TBCE</i>            | <i>IRF6</i>          | <i>MIXL1</i>                 | <i>REN</i>     |
| <i>MIXL1</i>           | <i>HSD11B1</i>       | <i>TGFB2</i>                 | <i>DES</i>     |
| <i>LBR</i>             | <i>PLXNA2</i>        | <i>PROX1</i>                 | <i>MPZ</i>     |
| <i>EPRS</i>            | <i>CD34</i>          | <i>HSD11B1</i>               | <i>ABCB6</i>   |
| <i>TGFB2</i>           | <i>CD46</i>          | <i>CD34</i>                  | <i>FN1</i>     |
| <i>IRF6</i>            | <i>CR2</i>           | <i>IL10</i>                  | <i>RPE</i>     |
| <i>HSD11B1</i>         | <i>CD55</i>          | <i>REN</i>                   | <i>SST</i>     |
| <i>PLXNA2</i>          | <i>REN</i>           | <i>FMOD</i>                  | <i>KNG1</i>    |
| <i>CD34</i>            | <i>FMOD</i>          | <i>CHI3L1</i>                | <i>VCAMI</i>   |
| <i>CD46</i>            | <i>PRELP</i>         | <i>CHIT1</i>                 | <i>F3</i>      |
| <i>IL10</i>            | <i>ADORA1</i>        | <i>AGXT</i>                  | <i>SOD2</i>    |
| <i>NFASC</i>           | <i>CFH</i>           | <i>GPC1</i>                  | <i>RHO</i>     |
| <i>REN</i>             | <i>PRG4</i>          | <i>PTPRC</i>                 | <i>SHH</i>     |
| <i>OPTC</i>            | <i>MYOC</i>          | <i>COL6A3</i>                | <i>NOS3</i>    |
| <i>CHI3L1</i>          | <i>SELE</i>          | <i>PTGS2</i>                 | <i>GJA1</i>    |
| <i>RNPEP</i>           | <i>SLC4A3</i>        | <i>LAMC2</i>                 | <i>TIMP2</i>   |
| <i>LMOD1</i>           | <i>DES</i>           | <i>SOAT1</i>                 | <i>MKI67</i>   |
| <i>PER2</i>            | <i>MPZ</i>           | <i>FASLG</i>                 | <i>APOA1</i>   |

---

|                |               |                 |                 |
|----------------|---------------|-----------------|-----------------|
| <i>PTPRC</i>   | <i>ABCB6</i>  | <i>SERPINE2</i> | <i>CALD1</i>    |
| <i>PRLH</i>    | <i>USF1</i>   | <i>SELP</i>     | <i>C2</i>       |
| <i>CRB1</i>    | <i>CD244</i>  | <i>POU2F1</i>   | <i>VAMP8</i>    |
| <i>CFH</i>     | <i>VANGL2</i> | <i>DES</i>      | <i>MMP3</i>     |
| <i>PTGS2</i>   | <i>FN1</i>    | <i>DDR2</i>     | <i>MMP1</i>     |
| <i>PDC</i>     | <i>NES</i>    | <i>MPZ</i>      | <i>GH1</i>      |
| <i>C1orf27</i> | <i>RPE</i>    | <i>ABCB6</i>    | <i>SLC17A5</i>  |
| <i>DHX9</i>    | <i>TFPI</i>   | <i>ADAMTS4</i>  | <i>NOVA2</i>    |
| <i>LAMC1</i>   | <i>NBPF14</i> | <i>IHH</i>      | <i>DMPK</i>     |
| <i>SOAT1</i>   | <i>SST</i>    | <i>CYP27A1</i>  | <i>NOS1</i>     |
| <i>PSMD1</i>   | <i>OLFML3</i> | <i>NHLH1</i>    | <i>ACE</i>      |
| <i>PRDX6</i>   | <i>KNG1</i>   | <i>CRP</i>      | <i>PVR</i>      |
| <i>TNFSF4</i>  | <i>CRYGS</i>  | <i>IGFBP5</i>   | <i>SERPINE1</i> |
| <i>FASLG</i>   | <i>ADORA3</i> | <i>NTRK1</i>    | <i>ACHE</i>     |
| <i>MYOC</i>    | <i>GCG</i>    | <i>FN1</i>      | <i>ENG</i>      |
| <i>COL4A3</i>  | <i>VCAM1</i>  | <i>NES</i>      | <i>BGN</i>      |
| <i>SELE</i>    | <i>F3</i>     | <i>RPE</i>      | <i>CD79A</i>    |
| <i>SELL</i>    | <i>MBNL1</i>  | <i>CREB1</i>    | <i>GALNS</i>    |
| <i>F5</i>      | <i>PLG</i>    | <i>MUC1</i>     | <i>TGFB1</i>    |
| <i>SELP</i>    | <i>SOD2</i>   | <i>NRP2</i>     | <i>VEGFA</i>    |
| <i>ATP1B1</i>  | <i>RHO</i>    | <i>SHC1</i>     | <i>HSPA5</i>    |
| <i>DPT</i>     | <i>VIPR2</i>  | <i>BMPR2</i>    | <i>COL1A1</i>   |
| <i>SLC4A3</i>  | <i>B3GAT1</i> | <i>SUMO1</i>    | <i>IGF1</i>     |
| <i>DES</i>     | <i>NLRP5</i>  | <i>CASP8</i>    | <i>GSN</i>      |
| <i>PBX1</i>    | <i>SHH</i>    | <i>S100A1</i>   | <i>COL1A2</i>   |
| <i>MPZ</i>     | <i>LIMS1</i>  | <i>S100A4</i>   | <i>DCN</i>      |

---

---

|               |                |                |                 |
|---------------|----------------|----------------|-----------------|
| <i>ABCB6</i>  | <i>NOS3</i>    | <i>FLG</i>     | <i>LUM</i>      |
| <i>USF1</i>   | <i>HGS</i>     | <i>CTSK</i>    | <i>TNC</i>      |
| <i>CD244</i>  | <i>HGD</i>     | <i>CTSS</i>    | <i>GFAP</i>     |
| <i>VANGL2</i> | <i>GJA1</i>    | <i>ECM1</i>    | <i>CDH1</i>     |
| <i>PEX19</i>  | <i>TIMP2</i>   | <i>TFPI</i>    | <i>CDKN1A</i>   |
| <i>ATPIA2</i> | <i>MKI67</i>   | <i>CALCRL</i>  | <i>PLAU</i>     |
| <i>PNKD</i>   | <i>KLK1</i>    | <i>ITGAV</i>   | <i>MFAP2</i>    |
| <i>CRP</i>    | <i>APOA1</i>   | <i>MF12</i>    | <i>CTNNA1</i>   |
| <i>DARC</i>   | <i>TFG</i>     | <i>TTN</i>     | <i>C10orf27</i> |
| <i>IGFBP2</i> | <i>CALD1</i>   | <i>ATF2</i>    | <i>ELN</i>      |
| <i>NTRK1</i>  | <i>C2</i>      | <i>NGF</i>     | <i>PTCH1</i>    |
| <i>FNI</i>    | <i>PAEP</i>    | <i>TP63</i>    | <i>MMP2</i>     |
| <i>LMNA</i>   | <i>TSPAN33</i> | <i>SST</i>     | <i>CNOT8</i>    |
| <i>RPE</i>    | <i>CNTN3</i>   | <i>ITGA6</i>   | <i>EDN1</i>     |
| <i>MAP2</i>   | <i>DBH</i>     | <i>ADIPOQ</i>  | <i>ICAM1</i>    |
| <i>CREB1</i>  | <i>VAMP8</i>   | <i>KNG1</i>    | <i>VIM</i>      |
| <i>MUC1</i>   | <i>MITF</i>    | <i>CRYGS</i>   | <i>AGT</i>      |
| <i>BMPR2</i>  | <i>MTF1</i>    | <i>GAD1</i>    | <i>TWIST1</i>   |
| <i>NPR1</i>   | <i>MMP3</i>    | <i>THPO</i>    | <i>TIMP1</i>    |
| <i>CFLAR</i>  | <i>MMP1</i>    | <i>CSF1</i>    | <i>MMRN1</i>    |
| <i>HSPD1</i>  | <i>HPD</i>     | <i>FAP</i>     | <i>WAS</i>      |
| <i>STAT1</i>  | <i>FLNB</i>    | <i>DPP4</i>    | <i>FOS</i>      |
| <i>MTMR11</i> | <i>GH1</i>     | <i>PIK3CA</i>  | <i>CYCS</i>     |
| <i>PHGDH</i>  | <i>TYR</i>     | <i>TNFSF10</i> | <i>CAT</i>      |
| <i>APOD</i>   | <i>SLC17A5</i> | <i>CLDN11</i>  | <i>TGFB3</i>    |
| <i>OPA1</i>   | <i>NOVA2</i>   | <i>COL11A1</i> | <i>CD44</i>     |

---

---

|                |                 |                 |               |
|----------------|-----------------|-----------------|---------------|
| <i>NGF</i>     | <i>SIX5</i>     | <i>EXTL2</i>    | <i>NOS2</i>   |
| <i>SST</i>     | <i>DMPK</i>     | <i>VCAM1</i>    | <i>VTN</i>    |
| <i>OLFML3</i>  | <i>NOS1</i>     | <i>SERPINI1</i> | <i>SMTN</i>   |
| <i>KNG1</i>    | <i>G6PD</i>     | <i>DPYD</i>     | <i>EGF</i>    |
| <i>CAPZA1</i>  | <i>ACE</i>      | <i>F3</i>       | <i>TGFB1</i>  |
| <i>CHRD</i>    | <i>RIMS1</i>    | <i>TNFAIP6</i>  | <i>KRT7</i>   |
| <i>CLCN2</i>   | <i>SFRS16</i>   | <i>CTSZ</i>     | <i>IL2</i>    |
| <i>PSMD2</i>   | <i>PVR</i>      | <i>CXCR4</i>    | <i>FGF2</i>   |
| <i>ABCC5</i>   | <i>PLAUR</i>    | <i>CYR61</i>    | <i>NUDT6</i>  |
| <i>PARL</i>    | <i>HCFC1</i>    | <i>THBS2</i>    | <i>MAPK3</i>  |
| <i>GSTM3</i>   | <i>MATN1</i>    | <i>MGAT5</i>    | <i>TNF</i>    |
| <i>SORT1</i>   | <i>HVCN1</i>    | <i>CPB1</i>     | <i>ITGAL</i>  |
| <i>MFN1</i>    | <i>TRIM37</i>   | <i>AGTR1</i>    | <i>MAPK8</i>  |
| <i>GPSM2</i>   | <i>SERPINE1</i> | <i>LPHN2</i>    | <i>TGFBR2</i> |
| <i>TANK</i>    | <i>ACHE</i>     | <i>CFC1</i>     | <i>TF</i>     |
| <i>TNFSF10</i> | <i>COIL</i>     | <i>PLG</i>      | <i>GLB1</i>   |
| <i>CNTF</i>    | <i>ENG</i>      | <i>LPA</i>      | <i>EGFR</i>   |
| <i>7-Mar</i>   | <i>BGN</i>      | <i>IGF2R</i>    | <i>RPS4X</i>  |
| <i>COL11A1</i> | <i>CD79A</i>    | <i>SOD2</i>     | <i>MMP9</i>   |
| <i>OLFM3</i>   | <i>RPS19P3</i>  | <i>VIL2</i>     | <i>MIP</i>    |
| <i>VCAM1</i>   | <i>PELI1</i>    | <i>MAP3K2</i>   | <i>SPARC</i>  |
| <i>BCHE</i>    | <i>MUT</i>      | <i>RPE65</i>    | <i>AKT1</i>   |
| <i>DPYD</i>    | <i>GALNS</i>    | <i>GLI2</i>     | <i>VCAN</i>   |
| <i>F3</i>      | <i>CETN2</i>    | <i>LEPR</i>     | <i>MAX</i>    |
| <i>ABCA4</i>   | <i>TGFB1</i>    | <i>ESR1</i>     | <i>CALCA</i>  |
| <i>P2RY1</i>   | <i>DHCR7</i>    | <i>ATP2C1</i>   | <i>IL8</i>    |

---

---

|                |                 |                |                 |
|----------------|-----------------|----------------|-----------------|
| <i>LCT</i>     | <i>GAL</i>      | <i>IL1RN</i>   | <i>FBNI</i>     |
| <i>DLL1</i>    | <i>VEGFA</i>    | <i>IL1B</i>    | <i>ALB</i>      |
| <i>CYR61</i>   | <i>CHAD</i>     | <i>IL1A</i>    | <i>COL18A1</i>  |
| <i>CP</i>      | <i>HSPA5</i>    | <i>RHO</i>     | <i>CTSD</i>     |
| <i>AGTR1</i>   | <i>AMT</i>      | <i>JUN</i>     | <i>PLAT</i>     |
| <i>LPHN2</i>   | <i>COL1A1</i>   | <i>GRM1</i>    | <i>BMP2</i>     |
| <i>PARK2</i>   | <i>IGF1</i>     | <i>RAB7A</i>   | <i>KIT</i>      |
| <i>PCOLCE2</i> | <i>HHEX</i>     | <i>SHH</i>     | <i>PCNA</i>     |
| <i>ATP1B3</i>  | <i>OCM2</i>     | <i>LIMS1</i>   | <i>CDKN1B</i>   |
| <i>ZBTB38</i>  | <i>TAC1</i>     | <i>ST14</i>    | <i>GP1BA</i>    |
| <i>COPB2</i>   | <i>GSN</i>      | <i>IL11</i>    | <i>MBP</i>      |
| <i>SOD2</i>    | <i>SLC25A13</i> | <i>LRP8</i>    | <i>BCL2</i>     |
| <i>PTGER3</i>  | <i>COL1A2</i>   | <i>TNFAIP3</i> | <i>IGF2</i>     |
| <i>TMEM22</i>  | <i>ODZ1</i>     | <i>FLI1</i>    | <i>CLU</i>      |
| <i>EPHB1</i>   | <i>CALCR</i>    | <i>ETS1</i>    | <i>THBS1</i>    |
| <i>TMEM37</i>  | <i>TLR4</i>     | <i>IL1R1</i>   | <i>PNMA2</i>    |
| <i>LEPR</i>    | <i>DCN</i>      | <i>CDKN2C</i>  | <i>SERPINF1</i> |
| <i>ESR1</i>    | <i>LUM</i>      | <i>TAAR1</i>   | <i>ALOX5AP</i>  |
| <i>IL1RN</i>   | <i>TNC</i>      | <i>CTGF</i>    | <i>FLT1</i>     |
| <i>TRH</i>     | <i>CFL1</i>     | <i>NOS3</i>    | <i>CD4</i>      |
| <i>IL1B</i>    | <i>NMT1</i>     | <i>ENPP1</i>   | <i>SOD1</i>     |
| <i>IL1A</i>    | <i>GFAP</i>     | <i>ESAM</i>    | <i>GAPDH</i>    |
| <i>RHO</i>     | <i>NTS</i>      | <i>CFHR1</i>   | <i>VWF</i>      |
| <i>BCL2L11</i> | <i>SRI</i>      | <i>FSTL1</i>   | <i>MMP14</i>    |
| <i>B3GAT1</i>  | <i>CDH1</i>     | <i>GSK3B</i>   | <i>APEX1</i>    |
| <i>NLRP5</i>   | <i>SLC4A1</i>   | <i>THY1</i>    |                 |

---

---

|                |                 |               |
|----------------|-----------------|---------------|
| <i>SHH</i>     | <i>PLA2G2D</i>  | <i>EPHA1</i>  |
| <i>OPCML</i>   | <i>CDKN1A</i>   | <i>FABP7</i>  |
| <i>IL11</i>    | <i>LCAT</i>     | <i>ZYX</i>    |
| <i>NCK2</i>    | <i>PLAU</i>     | <i>GJA1</i>   |
| <i>FASTK</i>   | <i>BRCA1</i>    | <i>ADAM8</i>  |
| <i>TBPL1</i>   | <i>PTPRB</i>    | <i>UTF1</i>   |
| <i>MYLK</i>    | <i>ADAMTS2</i>  | <i>TIMP2</i>  |
| <i>IL1R1</i>   | <i>DDX41</i>    | <i>PLN</i>    |
| <i>CTGF</i>    | <i>TDGF1</i>    | <i>EPHB6</i>  |
| <i>NOS3</i>    | <i>MFAP2</i>    | <i>PTCH2</i>  |
| <i>C2orf29</i> | <i>CDH5</i>     | <i>BIRC5</i>  |
| <i>FOXE3</i>   | <i>SMC2</i>     | <i>PLK3</i>   |
| <i>HGS</i>     | <i>CCK</i>      | <i>CXCR5</i>  |
| <i>CD86</i>    | <i>BAAT</i>     | <i>ROS1</i>   |
| <i>EAF2</i>    | <i>CTNNB1</i>   | <i>HAS1</i>   |
| <i>EIF5B</i>   | <i>C10orf27</i> | <i>MKI67</i>  |
| <i>NR1I2</i>   | <i>LRRC23</i>   | <i>CD200</i>  |
| <i>POMGNT1</i> | <i>ELN</i>      | <i>BRAF</i>   |
| <i>CD80</i>    | <i>PTCH1</i>    | <i>ADAM12</i> |
| <i>THY1</i>    | <i>STX1A</i>    | <i>KLK13</i>  |
| <i>HEY2</i>    | <i>ACAN</i>     | <i>KLK3</i>   |
| <i>MFRP</i>    | <i>TNMD</i>     | <i>KLK15</i>  |
| <i>GAP43</i>   | <i>ACAA1</i>    | <i>KLK1</i>   |
| <i>CLCN1</i>   | <i>MMP2</i>     | <i>IDS</i>    |
| <i>GJA1</i>    | <i>TAC3</i>     | <i>PTN</i>    |
| <i>TIMP2</i>   | <i>CHM</i>      | <i>PTGDS</i>  |

---

---

|                |               |                |
|----------------|---------------|----------------|
| <i>UROD</i>    | <i>BEST1</i>  | <i>APOA1</i>   |
| <i>PLN</i>     | <i>PLOD1</i>  | <i>HTRA1</i>   |
| <i>BOC</i>     | <i>CNOT8</i>  | <i>ZBTB16</i>  |
| <i>PLK3</i>    | <i>PES1</i>   | <i>ITGB4</i>   |
| <i>ROSI</i>    | <i>CDKN2A</i> | <i>YBX1</i>    |
| <i>FPR1</i>    | <i>EDN1</i>   | <i>NOTCH1</i>  |
| <i>MKI67</i>   | <i>TEK</i>    | <i>CALD1</i>   |
| <i>CD200</i>   | <i>USP9X</i>  | <i>FGFR2</i>   |
| <i>NPS</i>     | <i>HM13</i>   | <i>SEC23IP</i> |
| <i>CD96</i>    | <i>LY96</i>   | <i>GRB2</i>    |
| <i>FYN</i>     | <i>ICAM1</i>  | <i>NCAM1</i>   |
| <i>GRIN1</i>   | <i>VIM</i>    | <i>IL18</i>    |
| <i>DPP7</i>    | <i>AGT</i>    | <i>C2</i>      |
| <i>BACE1</i>   | <i>TNXB</i>   | <i>MKLN1</i>   |
| <i>ENTPD2</i>  | <i>WDR36</i>  | <i>IRF3</i>    |
| <i>WASF1</i>   | <i>TWIST1</i> | <i>ZNF643</i>  |
| <i>PTGDS</i>   | <i>TIMP1</i>  | <i>FCGRT</i>   |
| <i>APOA1</i>   | <i>CFP</i>    | <i>CD300LF</i> |
| <i>EIF2AK3</i> | <i>PAX6</i>   | <i>MMP17</i>   |
| <i>TFG</i>     | <i>MMRN1</i>  | <i>STX2</i>    |
| <i>ZBTB16</i>  | <i>CD59</i>   | <i>ATM</i>     |
| <i>FOXO3</i>   | <i>WAS</i>    | <i>MAP3K7</i>  |
| <i>CALD1</i>   | <i>NPY</i>    | <i>FOXP1</i>   |
| <i>BRWD2</i>   | <i>ITCH</i>   | <i>SOX9</i>    |
| <i>SEC23IP</i> | <i>FOS</i>    | <i>VAMP8</i>   |
| <i>NCAM1</i>   | <i>CYCS</i>   | <i>NTF4</i>    |

---

---

|                 |                   |                |
|-----------------|-------------------|----------------|
| <i>IL18</i>     | <i>CAT</i>        | <i>LEP</i>     |
| <i>C2</i>       | <i>TGFB3</i>      | <i>BAX</i>     |
| <i>CPA1</i>     | <i>CD44</i>       | <i>HABP2</i>   |
| <i>PAEP</i>     | <i>AP003117.1</i> | <i>TCF7L2</i>  |
| <i>POU1F1</i>   | <i>SYP</i>        | <i>MMP13</i>   |
| <i>ZMPSTE24</i> | <i>NOS2</i>       | <i>FUT1</i>    |
| <i>OLFM1</i>    | <i>VTN</i>        | <i>MMP12</i>   |
| <i>MCHR2</i>    | <i>SMTN</i>       | <i>MMP3</i>    |
| <i>RDX</i>      | <i>EGF</i>        | <i>MMP1</i>    |
| <i>TSPAN33</i>  | <i>PITX2</i>      | <i>MMP10</i>   |
| <i>TRIT1</i>    | <i>BBS9</i>       | <i>MMP8</i>    |
| <i>CNTN3</i>    | <i>TGFB1</i>      | <i>SLC16A6</i> |
| <i>ATM</i>      | <i>GRASP</i>      | <i>MMP7</i>    |
| <i>HEYL</i>     | <i>SLC6A6</i>     | <i>BIRC3</i>   |
| <i>CASP8AP2</i> | <i>KRT7</i>       | <i>FEZF2</i>   |
| <i>ADRB1</i>    | <i>MAZ</i>        | <i>PRKCA</i>   |
| <i>SSTR2</i>    | <i>PML</i>        | <i>CLIP1</i>   |
| <i>VAMP5</i>    | <i>IL2</i>        | <i>CAV1</i>    |
| <i>VAMP8</i>    | <i>FGF2</i>       | <i>HTRA2</i>   |
| <i>NTF4</i>     | <i>NUDT6</i>      | <i>ICAM2</i>   |
| <i>IMPDH1</i>   | <i>CD14</i>       | <i>C5AR1</i>   |
| <i>BAX</i>      | <i>ANXA13</i>     | <i>GHI</i>     |
| <i>PDGFD</i>    | <i>MAPK3</i>      | <i>CYP17A1</i> |
| <i>CNRI</i>     | <i>SERPINA4</i>   | <i>CTSC</i>    |
| <i>ABO</i>      | <i>TNF</i>        | <i>SLC17A5</i> |
| <i>MMP12</i>    | <i>SDC1</i>       | <i>PXN</i>     |

---



---

|                 |                |                 |
|-----------------|----------------|-----------------|
| <i>MTF1</i>     | <i>ITGAL</i>   | <i>NRCAM</i>    |
| <i>MMP3</i>     | <i>EDA</i>     | <i>CHDH</i>     |
| <i>MMP1</i>     | <i>CYB5R3</i>  | <i>NOVA2</i>    |
| <i>WASL</i>     | <i>MAPK8</i>   | <i>PPP2R4</i>   |
| <i>MMP8</i>     | <i>IGFBP3</i>  | <i>DMPK</i>     |
| <i>FUT2</i>     | <i>TNFRSF9</i> | <i>SLC26A3</i>  |
| <i>ATXN7</i>    | <i>ENO1</i>    | <i>VASP</i>     |
| <i>FEZF2</i>    | <i>TGFBR2</i>  | <i>ITIH4</i>    |
| <i>MTMR2</i>    | <i>UPP1</i>    | <i>NOS1</i>     |
| <i>KNTC1</i>    | <i>SLC18A3</i> | <i>PIK3CG</i>   |
| <i>PRKCA</i>    | <i>TF</i>      | <i>ACE</i>      |
| <i>APOH</i>     | <i>ASL</i>     | <i>MRC2</i>     |
| <i>COL8A2</i>   | <i>GLB1</i>    | <i>STAB1</i>    |
| <i>DIABLO</i>   | <i>EGFR</i>    | <i>DYSF</i>     |
| <i>DNASE1L3</i> | <i>RPS4X</i>   | <i>RELN</i>     |
| <i>FLNB</i>     | <i>PDGFRB</i>  | <i>BCL3</i>     |
| <i>NUP214</i>   | <i>MMP9</i>    | <i>PVR</i>      |
| <i>IMPG1</i>    | <i>ANGPTL7</i> | <i>EMD</i>      |
| <i>FOXP2</i>    | <i>EYA2</i>    | <i>SERPINH1</i> |
| <i>GHI</i>      | <i>MIP</i>     | <i>FLNA</i>     |
| <i>HESX1</i>    | <i>SPARC</i>   | <i>CHUK</i>     |
| <i>SAE1</i>     | <i>AKT1</i>    | <i>RPS6KB1</i>  |
| <i>ASS1</i>     | <i>VCAN</i>    | <i>IRAK1</i>    |
| <i>TYR</i>      | <i>MAX</i>     | <i>PLAUR</i>    |
| <i>CTSC</i>     | <i>CALCA</i>   | <i>SDC3</i>     |
| <i>SLC17A5</i>  | <i>EMP2</i>    | <i>HPSE2</i>    |

---

---

|                 |                 |                 |
|-----------------|-----------------|-----------------|
| <i>PXN</i>      | <i>SDCBP</i>    | <i>ARD1A</i>    |
| <i>TOR1B</i>    | <i>IL8</i>      | <i>MATN1</i>    |
| <i>CHDH</i>     | <i>AFM</i>      | <i>TEX101</i>   |
| <i>NOVA2</i>    | <i>AFP</i>      | <i>LEFTY2</i>   |
| <i>DMPK</i>     | <i>FBN1</i>     | <i>LCN2</i>     |
| <i>SLC26A4</i>  | <i>ARSB</i>     | <i>SERPINE1</i> |
| <i>F8</i>       | <i>ALB</i>      | <i>MPO</i>      |
| <i>OPA3</i>     | <i>COL18A1</i>  | <i>ACHE</i>     |
| <i>NOS1</i>     | <i>LYVE1</i>    | <i>TRPV4</i>    |
| <i>ZBTB8OS</i>  | <i>MN1</i>      | <i>POU2F2</i>   |
| <i>PIK3CG</i>   | <i>IL2RA</i>    | <i>IL17A</i>    |
| <i>IKBKG</i>    | <i>FOXC1</i>    | <i>HYAL1</i>    |
| <i>ERCC2</i>    | <i>LECT1</i>    | <i>EPHB4</i>    |
| <i>G6PD</i>     | <i>TUBB4</i>    | <i>ACTR2</i>    |
| <i>ACE</i>      | <i>MLANA</i>    | <i>ENG</i>      |
| <i>UBL4A</i>    | <i>SNAP25</i>   | <i>BGN</i>      |
| <i>RIMS1</i>    | <i>CTSD</i>     | <i>CD79A</i>    |
| <i>APOE</i>     | <i>SERPINB2</i> | <i>EPO</i>      |
| <i>PAX2</i>     | <i>SMN1</i>     | <i>SEMA3B</i>   |
| <i>PVR</i>      | <i>EIF5A</i>    | <i>ETV5</i>     |
| <i>SCD</i>      | <i>SMN2</i>     | <i>GALNS</i>    |
| <i>SERPINH1</i> | <i>GGT1</i>     | <i>CD2AP</i>    |
| <i>CA4</i>      | <i>PLAT</i>     | <i>TNFRSF21</i> |
| <i>FLNA</i>     | <i>BMP2</i>     | <i>IL18BP</i>   |
| <i>CHUK</i>     | <i>KIT</i>      | <i>TGFB1</i>    |
| <i>ABCC2</i>    | <i>PCNA</i>     | <i>CYBA</i>     |

---

---

|                 |                |                |
|-----------------|----------------|----------------|
| <i>HCFC1</i>    | <i>ADAL</i>    | <i>GABRQ</i>   |
| <i>XRCC1</i>    | <i>PTGER2</i>  | <i>DNTT</i>    |
| <i>GRM2</i>     | <i>NID2</i>    | <i>SFN</i>     |
| <i>AVPR2</i>    | <i>RBI</i>     | <i>CTTN</i>    |
| <i>ZNHIT1</i>   | <i>PRNP</i>    | <i>RUNX2</i>   |
| <i>GCLC</i>     | <i>SMARCA2</i> | <i>CCND1</i>   |
| <i>SERPINE1</i> | <i>ESD</i>     | <i>VEGFA</i>   |
| <i>CEACAM1</i>  | <i>AMELX</i>   | <i>MAPKAP1</i> |
| <i>MPO</i>      | <i>BCR</i>     | <i>TRIM63</i>  |
| <i>LPO</i>      | <i>FGFR1</i>   | <i>DAG1</i>    |
| <i>ACHE</i>     | <i>RIPK4</i>   | <i>HSPA5</i>   |
| <i>ZMYND10</i>  | <i>UCHL1</i>   | <i>MBTPS1</i>  |
| <i>IL17A</i>    | <i>STAP2</i>   | <i>XYLT2</i>   |
| <i>SCPEP1</i>   | <i>MMP26</i>   | <i>RHOA</i>    |
| <i>COIL</i>     | <i>CDKN1B</i>  | <i>CDH13</i>   |
| <i>ENG</i>      | <i>GP1BA</i>   | <i>COL1A1</i>  |
| <i>MMD</i>      | <i>MBP</i>     | <i>IGF1</i>    |
| <i>BGN</i>      | <i>MATK</i>    | <i>EFEMP1</i>  |
| <i>CD79A</i>    | <i>ITGA2</i>   | <i>CD40LG</i>  |
| <i>RPS19P3</i>  | <i>GSR</i>     | <i>MAF</i>     |
| <i>EPO</i>      | <i>SOD3</i>    | <i>FHL1</i>    |
| <i>PELI1</i>    | <i>BCL2</i>    | <i>SAGE1</i>   |
| <i>GALNS</i>    | <i>LDB2</i>    | <i>NGFR</i>    |
| <i>TNFRSF21</i> | <i>IGF2</i>    | <i>PHB</i>     |
| <i>CDT1</i>     | <i>CLU</i>     | <i>BCAR1</i>   |
| <i>TGFB1</i>    | <i>PROM1</i>   | <i>GPC3</i>    |

---

---

|                 |                 |                |
|-----------------|-----------------|----------------|
| <i>GABRQ</i>    | <i>COCH</i>     | <i>CNR2</i>    |
| <i>DNTT</i>     | <i>TBX1</i>     | <i>FAS</i>     |
| <i>SLC9A1</i>   | <i>GRP</i>      | <i>SLC25A3</i> |
| <i>AXL</i>      | <i>KCNE1</i>    | <i>CTSF</i>    |
| <i>CA5A</i>     | <i>THBS1</i>    | <i>TAC1</i>    |
| <i>MST1R</i>    | <i>PNMA2</i>    | <i>GSN</i>     |
| <i>RUNX2</i>    | <i>NEFM</i>     | <i>PTEN</i>    |
| <i>CYP2B7P1</i> | <i>SERPINF1</i> | <i>COL7A1</i>  |
| <i>FADD</i>     | <i>STC1</i>     | <i>ITGB3</i>   |
| <i>FOXC2</i>    | <i>ENO2</i>     | <i>SNCG</i>    |
| <i>FOXF1</i>    | <i>ALOX5AP</i>  | <i>EPHB2</i>   |
| <i>FGF19</i>    | <i>FLT1</i>     | <i>NSF</i>     |
| <i>LMX1B</i>    | <i>CD4</i>      | <i>COL1A2</i>  |
| <i>GAL</i>      | <i>CHRNA7</i>   | <i>RYR1</i>    |
| <i>TXNRD1</i>   | <i>MRAP</i>     | <i>TFPI2</i>   |
| <i>FMR1</i>     | <i>HUNK</i>     | <i>CDC42</i>   |
| <i>VEGFA</i>    | <i>SOD1</i>     | <i>CST6</i>    |
| <i>MAGEC2</i>   | <i>CHRFAM7A</i> | <i>BANF1</i>   |
| <i>TRIM63</i>   | <i>TJP1</i>     | <i>CDK6</i>    |
| <i>REL</i>      | <i>GAPDH</i>    | <i>HSPG2</i>   |
| <i>HSPA5</i>    | <i>PRTN3</i>    | <i>DCN</i>     |
| <i>AMT</i>      | <i>SETBP1</i>   | <i>LUM</i>     |
| <i>RHOA</i>     | <i>VWF</i>      | <i>PAPPA</i>   |
| <i>COL1A1</i>   | <i>MMP14</i>    | <i>MAP3K14</i> |
| <i>SGCA</i>     | <i>CDH2</i>     | <i>XIAP</i>    |
| <i>IGF1</i>     | <i>RNASE3</i>   | <i>TNC</i>     |

---

---

|                   |              |                |
|-------------------|--------------|----------------|
| <i>GSTP1</i>      | <i>APEX1</i> | <i>KRIT1</i>   |
| <i>LAMB2</i>      | <i>TGIF1</i> | <i>GFAP</i>    |
| <i>CD40LG</i>     | <i>LPIN2</i> | <i>NQO1</i>    |
| <i>GNPTAB</i>     |              | <i>SETD2</i>   |
| <i>CYP26A1</i>    |              | <i>ITGA2B</i>  |
| <i>HHEX</i>       |              | <i>HAS3</i>    |
| <i>SAGE1</i>      |              | <i>CDH1</i>    |
| <i>CLCF1</i>      |              | <i>CDH3</i>    |
| <i>RHOD</i>       |              | <i>CDKN1A</i>  |
| <i>GPC3</i>       |              | <i>LTF</i>     |
| <i>SPTBN1</i>     |              | <i>CCR5</i>    |
| <i>LIPA</i>       |              | <i>ETV7</i>    |
| <i>CNR2</i>       |              | <i>AGTR2</i>   |
| <i>APAF1</i>      |              | <i>SEMA3A</i>  |
| <i>FAS</i>        |              | <i>MAPK14</i>  |
| <i>GSN</i>        |              | <i>VCL</i>     |
| <i>AC009087.2</i> |              | <i>PLAU</i>    |
| <i>HP</i>         |              | <i>SLCO4A1</i> |
| <i>LGALS4</i>     |              | <i>HGF</i>     |
| <i>AIFM1</i>      |              | <i>CD36</i>    |
| <i>UCN2</i>       |              | <i>PPARD</i>   |
| <i>PON1</i>       |              | <i>MEN1</i>    |
| <i>SNCG</i>       |              | <i>LAMA5</i>   |
| <i>CIQB</i>       |              | <i>ADRM1</i>   |
| <i>SASH3</i>      |              | <i>PTPRB</i>   |
| <i>TAT</i>        |              | <i>SPDEF</i>   |

---

---

|                |                 |
|----------------|-----------------|
| <i>COL1A2</i>  | <i>PDLIM7</i>   |
| <i>OCRL</i>    | <i>IFNG</i>     |
| <i>CALB2</i>   | <i>MFAP2</i>    |
| <i>SOCS2</i>   | <i>GRIP1</i>    |
| <i>CALCR</i>   | <i>ESRRA</i>    |
| <i>MAPT</i>    | <i>TH1L</i>     |
| <i>TLR4</i>    | <i>HMGA2</i>    |
| <i>HSPG2</i>   | <i>LTBP1</i>    |
| <i>DCN</i>     | <i>STAT3</i>    |
| <i>LUM</i>     | <i>LEMD3</i>    |
| <i>KERA</i>    | <i>VEGFB</i>    |
| <i>XIAP</i>    | <i>CTNNB1</i>   |
| <i>TNC</i>     | <i>INVS</i>     |
| <i>KRIT1</i>   | <i>TLR3</i>     |
| <i>CSPG5</i>   | <i>C10orf27</i> |
| <i>KITLG</i>   | <i>MMP15</i>    |
| <i>GFAP</i>    | <i>PEPD</i>     |
| <i>DNAJC5</i>  | <i>TGFBR1</i>   |
| <i>ECE1</i>    | <i>NODAL</i>    |
| <i>PFTK1</i>   | <i>ACLY</i>     |
| <i>GLO1</i>    | <i>AIFM2</i>    |
| <i>CDA</i>     | <i>NKX2-5</i>   |
| <i>SRI</i>     | <i>RPSA</i>     |
| <i>CDH1</i>    | <i>BMP7</i>     |
| <i>SLC4A1</i>  | <i>JUP</i>      |
| <i>PLA2G2A</i> | <i>CDK4</i>     |

---

---

|                |                |
|----------------|----------------|
| <i>KCNMA1</i>  | <i>GAST</i>    |
| <i>CDKN1A</i>  | <i>DUSP1</i>   |
| <i>PSMB10</i>  | <i>AGAP2</i>   |
| <i>CCR5</i>    | <i>KRT17</i>   |
| <i>CTRL</i>    | <i>KRT19</i>   |
| <i>AGTR2</i>   | <i>FGF18</i>   |
| <i>MAPK14</i>  | <i>FURIN</i>   |
| <i>TCFL5</i>   | <i>GORASP1</i> |
| <i>ACD</i>     | <i>BLM</i>     |
| <i>VCL</i>     | <i>DOCK2</i>   |
| <i>CTCF</i>    | <i>CTSL2</i>   |
| <i>SOS1</i>    | <i>TYMP</i>    |
| <i>PLAU</i>    | <i>LAT2</i>    |
| <i>NTSR1</i>   | <i>ANPEP</i>   |
| <i>AGRP</i>    | <i>VEGFC</i>   |
| <i>HGF</i>     | <i>LIMK1</i>   |
| <i>FKBP5</i>   | <i>CCR7</i>    |
| <i>BRCA1</i>   | <i>HSD17B3</i> |
| <i>CYP11B1</i> | <i>HMMR</i>    |
| <i>RAMP2</i>   | <i>ARHGAP9</i> |
| <i>LYZ</i>     | <i>GLI1</i>    |
| <i>CPM</i>     | <i>MT3</i>     |
| <i>CDH4</i>    | <i>ELN</i>     |
| <i>EIF2AK2</i> | <i>CLDN4</i>   |
| <i>TSC22D3</i> | <i>CEBPB</i>   |
| <i>HSPB1</i>   | <i>AMFR</i>    |

---

---

|                 |                 |
|-----------------|-----------------|
| <i>LSR</i>      | <i>NOX1</i>     |
| <i>IFNG</i>     | <i>PTCH1</i>    |
| <i>MFAP2</i>    | <i>MYD88</i>    |
| <i>F12</i>      | <i>CES1</i>     |
| <i>GRIP1</i>    | <i>ACAN</i>     |
| <i>HPN</i>      | <i>LRP1</i>     |
| <i>BAK1</i>     | <i>TNFRSF1B</i> |
| <i>LTBP1</i>    | <i>MMP2</i>     |
| <i>WIF1</i>     | <i>SCRT1</i>    |
| <i>SMC2</i>     | <i>PALLD</i>    |
| <i>VEGFB</i>    | <i>HSF1</i>     |
| <i>BIRC6</i>    | <i>HSD17B6</i>  |
| <i>POR</i>      | <i>ERBB2</i>    |
| <i>TBK1</i>     | <i>CNOT8</i>    |
| <i>GNAS</i>     | <i>CYP21A2</i>  |
| <i>IGF1R</i>    | <i>NPPB</i>     |
| <i>CNOT1</i>    | <i>CPE</i>      |
| <i>GPI</i>      | <i>NPPA</i>     |
| <i>SRD5A2</i>   | <i>JAG2</i>     |
| <i>CYP4V2</i>   | <i>CYSLTR1</i>  |
| <i>XDH</i>      | <i>HAPLN1</i>   |
| <i>CTNNB1</i>   | <i>CXCL9</i>    |
| <i>INVS</i>     | <i>EDIL3</i>    |
| <i>C10orf27</i> | <i>SOX6</i>     |
| <i>NODAL</i>    | <i>CXCL10</i>   |
| <i>ACLY</i>     | <i>RASA1</i>    |

---



---

|                 |                |
|-----------------|----------------|
| <i>BMP7</i>     | <i>CXCL11</i>  |
| <i>FES</i>      | <i>TFAP2A</i>  |
| <i>ARSA</i>     | <i>PHYH</i>    |
| <i>BLM</i>      | <i>CYP19A1</i> |
| <i>C19orf2</i>  | <i>RAC1</i>    |
| <i>AURKA</i>    | <i>IFNB1</i>   |
| <i>HK1</i>      | <i>THBD</i>    |
| <i>TAP1</i>     | <i>CXCL13</i>  |
| <i>SCN5A</i>    | <i>ARG2</i>    |
| <i>TYMP</i>     | <i>CYBB</i>    |
| <i>LAT2</i>     | <i>IFNA1</i>   |
| <i>DDIT3</i>    | <i>FRAS1</i>   |
| <i>VEGFC</i>    | <i>CST3</i>    |
| <i>CCR7</i>     | <i>EDN1</i>    |
| <i>HLA-DQB1</i> | <i>ANTXR2</i>  |
| <i>PLIN</i>     | <i>ACTN1</i>   |
| <i>SBF1</i>     | <i>TEK</i>     |
| <i>ELN</i>      | <i>MUC16</i>   |
| <i>HPGD</i>     | <i>BMP3</i>    |
| <i>CEBPB</i>    | <i>LY75</i>    |
| <i>HAND2</i>    | <i>MAP2K4</i>  |
| <i>PTCH1</i>    | <i>PIN1</i>    |
| <i>SLC25A16</i> | <i>ABCC6</i>   |
| <i>SNAIL</i>    | <i>ETV1</i>    |
| <i>STX1A</i>    | <i>NELL2</i>   |
| <i>LRP1</i>     | <i>HPSE</i>    |

---

---

|                |                   |
|----------------|-------------------|
| <i>AGER</i>    | <i>DNMT1</i>      |
| <i>CLCN3</i>   | <i>XYLT1</i>      |
| <i>CSF3</i>    | <i>SOX4</i>       |
| <i>MLXIPL</i>  | <i>PRL</i>        |
| <i>MMP2</i>    | <i>ICAM1</i>      |
| <i>TNFRSF8</i> | <i>VIM</i>        |
| <i>NTRK3</i>   | <i>AC136618.1</i> |
| <i>HSF1</i>    | <i>AHR</i>        |
| <i>CHM</i>     | <i>TIMP3</i>      |
| <i>MFN2</i>    | <i>AGT</i>        |
| <i>BEST1</i>   | <i>TNXB</i>       |
| <i>SGCD</i>    | <i>FABP4</i>      |
| <i>CNOT8</i>   | <i>PDE4A</i>      |
| <i>TCAP</i>    | <i>APC</i>        |
| <i>NPPA</i>    | <i>TWIST1</i>     |
| <i>FEN1</i>    | <i>RAPGEF3</i>    |
| <i>NOD2</i>    | <i>MCC</i>        |
| <i>EGR2</i>    | <i>HMOX1</i>      |
| <i>MLC1</i>    | <i>EFNB2</i>      |
| <i>CLCN6</i>   | <i>DNMT3B</i>     |
| <i>GPHN</i>    | <i>BDNF</i>       |
| <i>TFAP2A</i>  | <i>ANXA2</i>      |
| <i>DCT</i>     | <i>SPARCL1</i>    |
| <i>PES1</i>    | <i>MAPRE1</i>     |
| <i>PDE7A</i>   | <i>ZNF410</i>     |
| <i>CYP19A1</i> | <i>DSPP</i>       |

---

---

|                 |                 |
|-----------------|-----------------|
| <i>NUCB2</i>    | <i>TIMP1</i>    |
| <i>IFNB1</i>    | <i>DMP1</i>     |
| <i>ARG2</i>     | <i>IBSP</i>     |
| <i>IFNA2</i>    | <i>MEPE</i>     |
| <i>IFNA1</i>    | <i>COL4A1</i>   |
| <i>EDN1</i>     | <i>SPP1</i>     |
| <i>ADAMTS10</i> | <i>COL2A1</i>   |
| <i>ANTXR2</i>   | <i>HIST1H1C</i> |
| <i>VSX1</i>     | <i>DNM2</i>     |
| <i>SAA2</i>     | <i>COL4A2</i>   |
| <i>SAA1</i>     | <i>IL6</i>      |
| <i>BMP3</i>     | <i>MMP16</i>    |
| <i>USP9X</i>    | <i>LOX</i>      |
| <i>CD83</i>     | <i>SMARCA4</i>  |
| <i>CAST</i>     | <i>CCL19</i>    |
| <i>MAP2K4</i>   | <i>LTBP2</i>    |
| <i>NYX</i>      | <i>MMRN1</i>    |
| <i>LDHA</i>     | <i>PGF</i>      |
| <i>NINL</i>     | <i>WAS</i>      |
| <i>OLFM2</i>    | <i>WNT1</i>     |
| <i>ABCC6</i>    | <i>FBN2</i>     |
| <i>PTPN5</i>    | <i>FOS</i>      |
| <i>ANGPTL6</i>  | <i>DHH</i>      |
| <i>HM13</i>     | <i>CYCS</i>     |
| <i>ID1</i>      | <i>CAT</i>      |
| <i>BCL2L1</i>   | <i>ELAVL3</i>   |

---

---

|                   |               |
|-------------------|---------------|
| <i>PRL</i>        | <i>TGFB3</i>  |
| <i>ICAM1</i>      | <i>CD44</i>   |
| <i>VIM</i>        | <i>CCNE2</i>  |
| <i>ICAM4</i>      | <i>VHL</i>    |
| <i>AC136618.1</i> | <i>LAMP1</i>  |
| <i>SMG1</i>       | <i>PRPH</i>   |
| <i>HEY1</i>       | <i>PIM2</i>   |
| <i>AHR</i>        | <i>IL3</i>    |
| <i>TIMP3</i>      | <i>DPP8</i>   |
| <i>AGT</i>        | <i>CSF2</i>   |
| <i>WDR36</i>      | <i>SDC2</i>   |
| <i>APC</i>        | <i>PPP3CA</i> |
| <i>SNX16</i>      | <i>MMP24</i>  |
| <i>TWIST1</i>     | <i>TRAF6</i>  |
| <i>ERCC5</i>      | <i>RAG1</i>   |
| <i>HMOX1</i>      | <i>MATN2</i>  |
| <i>EFNB2</i>      | <i>NFKB1</i>  |
| <i>CA1</i>        | <i>PPP3R1</i> |
| <i>CA2</i>        | <i>PRKCB</i>  |
| <i>BDNF</i>       | <i>IL5</i>    |
| <i>ARAF</i>       | <i>LGALS1</i> |
| <i>TIMP1</i>      | <i>AGRN</i>   |
| <i>COL4A1</i>     | <i>IL13</i>   |
| <i>SPP1</i>       | <i>IL4</i>    |
| <i>COL2A1</i>     | <i>EXT2</i>   |
| <i>HFE</i>        | <i>RECK</i>   |

---

---

|                |               |
|----------------|---------------|
| <i>IL6</i>     | <i>MAP2K1</i> |
| <i>SENP1</i>   | <i>MAP2K3</i> |
| <i>PAX6</i>    | <i>TIMP4</i>  |
| <i>VSX2</i>    | <i>PPARG</i>  |
| <i>ABCD4</i>   | <i>SMAD6</i>  |
| <i>LOX</i>     | <i>NOS2</i>   |
| <i>DECRI</i>   | <i>SMAD3</i>  |
| <i>WT1</i>     | <i>SEL1L</i>  |
| <i>TPM1</i>    | <i>RAF1</i>   |
| <i>CCL19</i>   | <i>LEF1</i>   |
| <i>CCL21</i>   | <i>HLA-E</i>  |
| <i>LTBP2</i>   | <i>VTN</i>    |
| <i>GPNUMB</i>  | <i>ZEB1</i>   |
| <i>CA12</i>    | <i>CALR</i>   |
| <i>SNCA</i>    | <i>TGOLN2</i> |
| <i>LDLR</i>    | <i>SMTN</i>   |
| <i>MMRN1</i>   | <i>SPAG5</i>  |
| <i>CD59</i>    | <i>GLCE</i>   |
| <i>PDLIM5</i>  | <i>CTHRC1</i> |
| <i>PGF</i>     | <i>EGF</i>    |
| <i>WAS</i>     | <i>WNT7A</i>  |
| <i>PVALB</i>   | <i>TGFBI</i>  |
| <i>SLC12A2</i> | <i>LRP12</i>  |
| <i>FBN2</i>    | <i>TBX20</i>  |
| <i>EPOR</i>    | <i>ANGPT1</i> |
| <i>FOS</i>     | <i>ACVRL1</i> |

---

---

|               |                  |
|---------------|------------------|
| <i>F7</i>     | <i>NPTXR</i>     |
| <i>CYCS</i>   | <i>KRT7</i>      |
| <i>CAT</i>    | <i>PDGFB</i>     |
| <i>HINT1</i>  | <i>ADAM17</i>    |
| <i>IL2RB</i>  | <i>EBAG9</i>     |
| <i>TGFB3</i>  | <i>DDR1</i>      |
| <i>RAC2</i>   | <i>CD19</i>      |
| <i>RASL12</i> | <i>FBLN5</i>     |
| <i>MAPK7</i>  | <i>EGR1</i>      |
| <i>CD44</i>   | <i>ODC1</i>      |
| <i>VHL</i>    | <i>KRT8P9</i>    |
| <i>LAMP1</i>  | <i>SRC</i>       |
| <i>CA9</i>    | <i>ANXA5</i>     |
| <i>SLC1A2</i> | <i>EXT1</i>      |
| <i>CSF2</i>   | <i>GIT1</i>      |
| <i>GSTT1</i>  | <i>TNFRSF11B</i> |
| <i>NGB</i>    | <i>NOV</i>       |
| <i>GSTZ1</i>  | <i>ENPP2</i>     |
| <i>NFKB1</i>  | <i>TGM2</i>      |
| <i>IRF1</i>   | <i>LOXL1</i>     |
| <i>IL5</i>    | <i>COL14A1</i>   |
| <i>MOG</i>    | <i>HBEGF</i>     |
| <i>RAD50</i>  | <i>EP300</i>     |
| <i>LGALS1</i> | <i>IL2</i>       |
| <i>AQP2</i>   | <i>RET</i>       |
| <i>ALKBH1</i> | <i>FGF2</i>      |

---

---

|                |                 |
|----------------|-----------------|
| <i>IL4</i>     | <i>NUDT6</i>    |
| <i>HLA-A</i>   | <i>HAS2</i>     |
| <i>SYP</i>     | <i>CXCL12</i>   |
| <i>PRDX2</i>   | <i>MYCN</i>     |
| <i>BAMBI</i>   | <i>AEBP1</i>    |
| <i>SMAD6</i>   | <i>MAPK3</i>    |
| <i>NOS2</i>    | <i>CSK</i>      |
| <i>SMAD3</i>   | <i>SERPINA1</i> |
| <i>RAF1</i>    | <i>ANXA1</i>    |
| <i>HADH</i>    | <i>SP1</i>      |
| <i>CLCN5</i>   | <i>MYL7</i>     |
| <i>HLA-E</i>   | <i>KAT2B</i>    |
| <i>VTN</i>     | <i>MSN</i>      |
| <i>ZEB1</i>    | <i>MATN3</i>    |
| <i>CALR</i>    | <i>TNF</i>      |
| <i>CLN6</i>    | <i>MYC</i>      |
| <i>SMTN</i>    | <i>SDC1</i>     |
| <i>SPAG5</i>   | <i>ITGAL</i>    |
| <i>EGF</i>     | <i>CCL2</i>     |
| <i>ALLC</i>    | <i>APOB</i>     |
| <i>RIMS2</i>   | <i>CCL7</i>     |
| <i>NEUROG1</i> | <i>EDA</i>      |
| <i>PITX2</i>   | <i>CCL11</i>    |
| <i>BBS9</i>    | <i>CCL8</i>     |
| <i>TGFBI</i>   | <i>PPIA</i>     |
| <i>SLC6A6</i>  | <i>CSPG4</i>    |

---

---

|                 |                 |
|-----------------|-----------------|
| <i>NR2E3</i>    | <i>FGF1</i>     |
| <i>KRT7</i>     | <i>MIF</i>      |
| <i>UGT8</i>     | <i>SERPING1</i> |
| <i>PDGFB</i>    | <i>WISP1</i>    |
| <i>FLOT1</i>    | <i>ITGA5</i>    |
| <i>LPHN1</i>    | <i>MAPK8</i>    |
| <i>PDE5A</i>    | <i>FOXO4</i>    |
| <i>EGR1</i>     | <i>IGFBP1</i>   |
| <i>KRT3</i>     | <i>IGFBP3</i>   |
| <i>HSPA9</i>    | <i>VAMP3</i>    |
| <i>GRAP2</i>    | <i>PARK7</i>    |
| <i>PTGER1</i>   | <i>MMP28</i>    |
| <i>KRT8P9</i>   | <i>PPP1R1A</i>  |
| <i>ANXA5</i>    | <i>EDNRA</i>    |
| <i>CTNNB1</i>   | <i>SDC4</i>     |
| <i>KRT18P19</i> | <i>ADCY3</i>    |
| <i>ROCK2</i>    | <i>CCL5</i>     |
| <i>TGM2</i>     | <i>TGFBR2</i>   |
| <i>LOXL1</i>    | <i>NONO</i>     |
| <i>NRG2</i>     | <i>CCL3</i>     |
| <i>COL14A1</i>  | <i>PTK2</i>     |
| <i>IL2</i>      | <i>CCL4</i>     |
| <i>RET</i>      | <i>POMC</i>     |
| <i>FGF2</i>     | <i>TF</i>       |
| <i>CDIPT</i>    | <i>BST2</i>     |
| <i>NUDT6</i>    | <i>NCOA4</i>    |

---



---

|                 |                 |
|-----------------|-----------------|
| <i>TRPM3</i>    | <i>ADRB2</i>    |
| <i>INTU</i>     | <i>HSP90AA2</i> |
| <i>NOTCH3</i>   | <i>CTSH</i>     |
| <i>CYP1A1</i>   | <i>MMP19</i>    |
| <i>ANXA13</i>   | <i>ITGAM</i>    |
| <i>CYP1A2</i>   | <i>CDK2</i>     |
| <i>MAPK3</i>    | <i>GLB1</i>     |
| <i>SERPINA6</i> | <i>CXCR3</i>    |
| <i>SERPINA1</i> | <i>MS4A2</i>    |
| <i>MTSSI</i>    | <i>ERBB3</i>    |
| <i>SERPINA3</i> | <i>EGFR</i>     |
| <i>CYP4F3</i>   | <i>RPS4X</i>    |
| <i>HEPH</i>     | <i>FBLN1</i>    |
| <i>LTA</i>      | <i>CTSL1</i>    |
| <i>CD2BP2</i>   | <i>CSF1R</i>    |
| <i>TNF</i>      | <i>CCRK</i>     |
| <i>CYP2D6</i>   | <i>PDGFRB</i>   |
| <i>ITGAL</i>    | <i>MMP9</i>     |
| <i>RAB8A</i>    | <i>CD40</i>     |
| <i>ACOT7</i>    | <i>PPARA</i>    |
| <i>CBX5</i>     | <i>CKB</i>      |
| <i>EFNB1</i>    | <i>JUND</i>     |
| <i>GYPB</i>     | <i>MAPRE3</i>   |
| <i>FGF1</i>     | <i>SYK</i>      |
| <i>SMTNL1</i>   | <i>ROR2</i>     |
| <i>YWHAB</i>    | <i>SPTLC1</i>   |

---

---

|                 |              |
|-----------------|--------------|
| <i>ADCY1</i>    | <i>RXFP1</i> |
| <i>MAPK8</i>    | <i>COMP</i>  |
| <i>WARS</i>     | <i>MIP</i>   |
| <i>TNFRSF9</i>  | <i>SPARC</i> |
| <i>SLPI</i>     | <i>AKT1</i>  |
| <i>POU4F2</i>   | <i>ADCY7</i> |
| <i>PPP1R1A</i>  | <i>OGN</i>   |
| <i>EDNRA</i>    | <i>VCAN</i>  |
| <i>GJB1</i>     | <i>MAX</i>   |
| <i>ADCY3</i>    | <i>DMD</i>   |
| <i>ENO1</i>     | <i>CALCA</i> |
| <i>TGFBR2</i>   | <i>FSCN1</i> |
| <i>UPP1</i>     | <i>DSP</i>   |
| <i>CHAT</i>     | <i>FGF7</i>  |
| <i>EIF2C2</i>   | <i>EDNRB</i> |
| <i>SLC18A3</i>  | <i>CIITA</i> |
| <i>POMC</i>     | <i>OSM</i>   |
| <i>NTRK2</i>    | <i>LIF</i>   |
| <i>H6PD</i>     | <i>COPS2</i> |
| <i>TF</i>       | <i>ACTB</i>  |
| <i>GLYAT</i>    | <i>EPGN</i>  |
| <i>GDF11</i>    | <i>ESR2</i>  |
| <i>ADRB2</i>    | <i>PTH</i>   |
| <i>HSP90AA2</i> | <i>CXCL5</i> |
| <i>WDR20</i>    | <i>PPBP</i>  |
| <i>SLURP1</i>   | <i>PF4</i>   |

---

---

|                   |                |
|-------------------|----------------|
| <i>SILV</i>       | <i>IL8</i>     |
| <i>HSPA1A</i>     | <i>RETN</i>    |
| <i>HSPA1B</i>     | <i>F13A1</i>   |
| <i>CCR4</i>       | <i>AFM</i>     |
| <i>BCL2A1</i>     | <i>COL6A2</i>  |
| <i>GLB1</i>       | <i>PARVA</i>   |
| <i>NEU1</i>       | <i>FBN1</i>    |
| <i>EGFR</i>       | <i>ALB</i>     |
| <i>GAS1</i>       | <i>FREM1</i>   |
| <i>RPS4X</i>      | <i>PHEX</i>    |
| <i>PDE6A</i>      | <i>F2RL1</i>   |
| <i>ALI17209.1</i> | <i>F2R</i>     |
| <i>CSF1R</i>      | <i>RRBP1</i>   |
| <i>MMP9</i>       | <i>PTHLH</i>   |
| <i>APOBEC3G</i>   | <i>COL18A1</i> |
| <i>CD40</i>       | <i>DSTN</i>    |
| <i>ANGPTL7</i>    | <i>GNA12</i>   |
| <i>PLEC1</i>      | <i>EWSR1</i>   |
| <i>COMP</i>       | <i>HIF1A</i>   |
| <i>MLH1</i>       | <i>HMGCR</i>   |
| <i>CPNE1</i>      | <i>LYVE1</i>   |
| <i>RBM12</i>      | <i>ITGB2</i>   |
| <i>BRD1</i>       | <i>SNAI2</i>   |
| <i>MIP</i>        | <i>ADM</i>     |
| <i>SPARC</i>      | <i>SSPN</i>    |
| <i>AKT1</i>       | <i>STATH</i>   |

---

---

|               |                  |
|---------------|------------------|
| <i>ADCY7</i>  | <i>CSN2</i>      |
| <i>MTHFR</i>  | <i>CEBPD</i>     |
| <i>OGN</i>    | <i>TP53</i>      |
| <i>VCAN</i>   | <i>LECT1</i>     |
| <i>OPTN</i>   | <i>CREBBP</i>    |
| <i>MAX</i>    | <i>TUBB4</i>     |
| <i>XRCC4</i>  | <i>JAG1</i>      |
| <i>CALCA</i>  | <i>TMPRSS11D</i> |
| <i>BMP6</i>   | <i>CTSD</i>      |
| <i>MAP2K7</i> | <i>SERPINB2</i>  |
| <i>CDC123</i> | <i>RLN2</i>      |
| <i>POU4F1</i> | <i>OTX2</i>      |
| <i>FGF7</i>   | <i>JAK2</i>      |
| <i>EDNRB</i>  | <i>IGFBP7</i>    |
| <i>ACTB</i>   | <i>IKBKB</i>     |
| <i>MTHFD1</i> | <i>HOPX</i>      |
| <i>ESR2</i>   | <i>MMP25</i>     |
| <i>PTH</i>    | <i>PLAT</i>      |
| <i>CXCL2</i>  | <i>BMP2</i>      |
| <i>SDCBP</i>  | <i>PDGFA</i>     |
| <i>FCER2</i>  | <i>NRTN</i>      |
| <i>IL8</i>    | <i>LGALS3</i>    |
| <i>USP6NL</i> | <i>CLDN7</i>     |
| <i>TEAD1</i>  | <i>GRPR</i>      |
| <i>NF2</i>    | <i>OCLN</i>      |
| <i>PER1</i>   | <i>KLF6</i>      |

---

---

|                |                   |
|----------------|-------------------|
| <i>PSIP1</i>   | <i>TAF9</i>       |
| <i>FBN1</i>    | <i>KDR</i>        |
| <i>OVOL2</i>   | <i>AC145132.3</i> |
| <i>NEFH</i>    | <i>FIGF</i>       |
| <i>RP1</i>     | <i>KIT</i>        |
| <i>TMTC1</i>   | <i>CBS</i>        |
| <i>ALB</i>     | <i>BMP4</i>       |
| <i>PHEX</i>    | <i>SFRP1</i>      |
| <i>COL18A1</i> | <i>ILK</i>        |
| <i>PPL</i>     | <i>IDO1</i>       |
| <i>OTOR</i>    | <i>PCNA</i>       |
| <i>HIF1A</i>   | <i>RASSF2</i>     |
| <i>SLC4A4</i>  | <i>ADRA1D</i>     |
| <i>SIX1</i>    | <i>MMP11</i>      |
| <i>TYRP1</i>   | <i>ADAM9</i>      |
| <i>ADM</i>     | <i>MGP</i>        |
| <i>HMOX2</i>   | <i>ATL1</i>       |
| <i>VAV1</i>    | <i>FGFR1</i>      |
| <i>SBF2</i>    | <i>MLST8</i>      |
| <i>MN1</i>     | <i>MAPK1</i>      |
| <i>IL2RA</i>   | <i>MMP26</i>      |
| <i>B2M</i>     | <i>BACE2</i>      |
| <i>OLFM4</i>   | <i>CDKN1B</i>     |
| <i>SULT1E1</i> | <i>MAP3K1</i>     |
| <i>TP53</i>    | <i>EPST11</i>     |
| <i>ADCY9</i>   | <i>TNFSF11</i>    |

---

---

|                  |                  |
|------------------|------------------|
| <i>FOXC1</i>     | <i>GPIBA</i>     |
| <i>FOXQ1</i>     | <i>IL6ST</i>     |
| <i>SHBG</i>      | <i>MBP</i>       |
| <i>TNFSF14</i>   | <i>ESM1</i>      |
| <i>CREBBP</i>    | <i>FST</i>       |
| <i>BTBD3</i>     | <i>ITGA2</i>     |
| <i>CARTPT</i>    | <i>ITGA1</i>     |
| <i>CD68</i>      | <i>ETS2</i>      |
| <i>JAG1</i>      | <i>FGF10</i>     |
| <i>AIRE</i>      | <i>OLR1</i>      |
| <i>TMPRSS11D</i> | <i>NFKB1A</i>    |
| <i>PDCD1LG2</i>  | <i>DUSP4</i>     |
| <i>CTSD</i>      | <i>POSTN</i>     |
| <i>CD274</i>     | <i>SOD3</i>      |
| <i>LPHN3</i>     | <i>PPARGC1A</i>  |
| <i>NHS</i>       | <i>CD81</i>      |
| <i>PLCB4</i>     | <i>A2M</i>       |
| <i>IKBKB</i>     | <i>SERPINB5</i>  |
| <i>AKR1C4</i>    | <i>BCL2</i>      |
| <i>AKR1C3</i>    | <i>C4A</i>       |
| <i>EIF5A</i>     | <i>TNFRSF11A</i> |
| <i>GGT1</i>      | <i>INS</i>       |
| <i>PLAT</i>      | <i>IGF2</i>      |
| <i>BMP2</i>      | <i>CLU</i>       |
| <i>PDGFA</i>     | <i>PROM1</i>     |
| <i>LGALS3</i>    | <i>TPSAB1</i>    |

---

---

|                   |                 |
|-------------------|-----------------|
| <i>AKRIC2</i>     | <i>RUNX1</i>    |
| <i>GLIS3</i>      | <i>PTK2B</i>    |
| <i>AKRIC1</i>     | <i>RCAN1</i>    |
| <i>ACE2</i>       | <i>PRKD1</i>    |
| <i>PIR</i>        | <i>SLC5A3</i>   |
| <i>KIT</i>        | <i>GZMB</i>     |
| <i>CBS</i>        | <i>THBS1</i>    |
| <i>BMP4</i>       | <i>PNMA2</i>    |
| <i>SFRP1</i>      | <i>C1R</i>      |
| <i>ILK</i>        | <i>C1S</i>      |
| <i>FANCB</i>      | <i>STUB1</i>    |
| <i>PCNA</i>       | <i>SERPINF1</i> |
| <i>PTGER2</i>     | <i>PTPN6</i>    |
| <i>HBB</i>        | <i>SERPINF2</i> |
| <i>RBI</i>        | <i>ALOX5AP</i>  |
| <i>PRNP</i>       | <i>HMGB1</i>    |
| <i>ADRA1D</i>     | <i>LOXL2</i>    |
| <i>SMPD1</i>      | <i>SMAD4</i>    |
| <i>TFF1</i>       | <i>FLT1</i>     |
| <i>GTPBP4</i>     | <i>CD151</i>    |
| <i>HTR2A</i>      | <i>CD4</i>      |
| <i>HTR1A</i>      | <i>YWHAE</i>    |
| <i>AC055839.1</i> | <i>ZNF384</i>   |
| <i>BCR</i>        | <i>LIPG</i>     |
| <i>MGP</i>        | <i>MSX1</i>     |
| <i>SAV1</i>       | <i>DYM</i>      |

---

---

|                |                 |
|----------------|-----------------|
| <i>ERCC8</i>   | <i>SMAD7</i>    |
| <i>EMP1</i>    | <i>SMAD2</i>    |
| <i>TPT1</i>    | <i>BMP1</i>     |
| <i>MAPK1</i>   | <i>JPH4</i>     |
| <i>TSC22D1</i> | <i>TRIO</i>     |
| <i>BACE2</i>   | <i>LRPAP1</i>   |
| <i>CDKN1B</i>  | <i>SOD1</i>     |
| <i>SLC4A11</i> | <i>MYH7</i>     |
| <i>ARSD</i>    | <i>C16orf35</i> |
| <i>ADRB3</i>   | <i>TJP1</i>     |
| <i>TRIM21</i>  | <i>GAPDH</i>    |
| <i>UBE2K</i>   | <i>IFITM1</i>   |
| <i>GP1BA</i>   | <i>ELANE</i>    |
| <i>TSC2</i>    | <i>PRTN3</i>    |
| <i>STK19P</i>  | <i>FGF9</i>     |
| <i>MBP</i>     | <i>LPL</i>      |
| <i>ESM1</i>    | <i>ADAMTS5</i>  |
| <i>CNDP1</i>   | <i>FSTL3</i>    |
| <i>FOXO1</i>   | <i>JUB</i>      |
| <i>TBC1D1</i>  | <i>ADAMTS1</i>  |
| <i>SSTR1</i>   | <i>VWF</i>      |
| <i>ISL1</i>    | <i>APP</i>      |
| <i>FGF10</i>   | <i>NTF3</i>     |
| <i>CCL28</i>   | <i>BSG</i>      |
| <i>GSR</i>     | <i>BGLAP</i>    |
| <i>NFKB1A</i>  | <i>MMP14</i>    |

---



---

|                  |               |
|------------------|---------------|
| <i>POSTN</i>     | <i>FGF23</i>  |
| <i>PTGER4</i>    | <i>NRIP1</i>  |
| <i>SERPINB3</i>  | <i>MEP1B</i>  |
| <i>A2M</i>       | <i>CDH2</i>   |
| <i>CTNS</i>      | <i>CTSB</i>   |
| <i>BCL2</i>      | <i>GATA4</i>  |
| <i>PBK</i>       | <i>APEX1</i>  |
| <i>C4A</i>       | <i>GATA6</i>  |
| <i>LDB2</i>      | <i>ANGPT2</i> |
| <i>TNFRSF11A</i> | <i>ROCK1</i>  |
| <i>COMT</i>      | <i>TWSG1</i>  |
| <i>INS</i>       |               |
| <i>IGF2</i>      |               |
| <i>GDNF</i>      |               |
| <i>CLU</i>       |               |
| <i>COCH</i>      |               |
| <i>HLA-DRB3</i>  |               |
| <i>EPHX2</i>     |               |
| <i>ADCY10</i>    |               |
| <i>SLC1A3</i>    |               |
| <i>MSLN</i>      |               |
| <i>PEX5</i>      |               |
| <i>THBS1</i>     |               |
| <i>PNMA2</i>     |               |
| <i>NEFL</i>      |               |
| <i>NEFM</i>      |               |

---

---

*C1S*

*STUB1*

*SERPINF1*

*SERPINF2*

*ENO2*

*ALOX5AP*

*LOXL2*

*C4B*

*NPR3*

*TNFRSF10A*

*BID*

*FLT1*

*TNFRSF10B*

*PDX1*

*CD4*

*YWHAE*

*SNPH*

*NRL*

*GREM1*

*SMAD7*

*SMAD2*

*BMP1*

*MRAP*

*LRPAP1*

*CENPJ*

*SOD1*

---

---

*C16orf35*

*MPG*

*HTT*

*GAPDH*

*SGCG*

*SETBP1*

*TNFRSF1A*

*PSMB5*

*VWF*

*AQP1*

*APP*

*TERT*

*NTF3*

*BSG*

*GJB2*

*MMP14*

*SLC7A7*

*BTG3*

*IDUA*

*FOXM1*

*TTR*

*FKBP4*

*PDE6B*

*AQP4*

*APEX1*

*MIB1*

---

---

*ROCK1*

*ZFP161*

*DLGAP1*

*TGIF1*

*AC217779.1*

---

Table S2. Summary of biological process gene set enrichment analysis of text mining genes.

| Process                                                  | Genes in query set | Total genes in genome | Corrected hypergeometric P value | Genes                                                                                                                                                                                                     |
|----------------------------------------------------------|--------------------|-----------------------|----------------------------------|-----------------------------------------------------------------------------------------------------------------------------------------------------------------------------------------------------------|
| Extracellular matrix organization                        | 31                 | 257                   | 3.47E-27                         | <i>CDH1, CD44, VWF, VTN, VCAM1, TNF, THBS1, TGFBI, SPARC, BGN, SERPINE1, NID1, MMP14, MMP9, MMP3, MMP2, MMP1, MFAP2, LUM, ITGAL, ICAM1, TNC, FNI, FGF2, FBNI, ELN, COL18A1, DCN, VCAN, COL1A2, COL1A1</i> |
| Platelet degranulation                                   | 20                 | 125                   | 2.44E-19                         | <i>CLU, MMRN1, VWF, VEGFA, TIMP1, THBS1, TGFB3, TGFB2, TGFB1, TF, SPARC, SOD1, SERPINE1, KNG1, IGF2, IGF1, APOA1, FNI, ALB, EGF</i>                                                                       |
| Cytokine-mediated signaling pathway                      | 25                 | 290                   | 3.99E-18                         | <i>CDKN1A, CD4, VIM, VEGFA, VCAM1, TWIST1, TNF, TIMP1, TGFBI, BCL2, NOS2, MMP9, MMP3, MMP2, MMP1, KIT, IL8, IL2, ICAM1, FOS, FNI, FGF2, AKT1, F3, COL1A2</i>                                              |
| Response to drug                                         | 22                 | 305                   | 3.82E-14                         | <i>CDKN1B, CDKN1A, CDH1, CAT, TIMP2, THBS1, TGFB2, TGFB1, SST, SOD1, BCL2, REN, PTCH1, APOA1, ICAM1, APEX1, FOS, ENG, EDNI, COL18A1, CTNNB1, COL1A1</i>                                                   |
| Positive regulation of cell population Proliferation     | 27                 | 557                   | 1.45E-13                         | <i>CDKN1B, CNOT8, VEGFA, TIMP1, THBS1, TGFB2, TGFB3, TGFB1, SHH, RPS4X, BCL2, KIT, IL2, IGF2, IGF1, TNC, FNI, FLT1, FGF2, AKT1, AGT, EGFR, EGF, EDNI, COL18A1, CTNNB1</i>                                 |
| Response to hypoxia                                      | 17                 | 174                   | 7.16E-13                         | <i>CDKN1B, CAT, VEGFA, THBS1, TGFB2, TGFB3, TGFB1, BMP2, PLAU, PLAT, NOS2, NOS1, MMP14, MMP2, ICAM1, ENG, EDNI</i>                                                                                        |
| Wound healing                                            | 14                 | 103                   | 1.99E-12                         | <i>TIMP1, TGFB2, TGFB3, TGFB1, SPARC, IGF1, TNC, GSN, FNI, FGF2, ENG, EGFR, DCN, COL1A1</i>                                                                                                               |
| Regulation of cell population Proliferation              | 18                 | 222                   | 2.05E-12                         | <i>CLU, CDKN1B, TNF, TGFB2, TGFB3, TGFB1, SPARC, SHH, PTCH1, PLAU, NOS2, KIT, TNC, ENG, AGT, EGFR, CTNNB1</i>                                                                                             |
| Negative regulation of gene expression                   | 20                 | 310                   | 4.16E-12                         | <i>CDKN1A, CD34, VEGFA, TNF, TGFB2, TGFB1, BMP2, SHH, SERPINF1, NOS2, MAX, IL8, IGF1, FGF2, AKT1, ENG, AGT, EDNI, ACE, CTNNB1</i>                                                                         |
| Positive regulation of gene expression                   | 24                 | 498                   | 4.56E-12                         | <i>CLU, CD34, VIM, VEGFA, TWIST1, TNF, TGFB1, BMP2, SHH, MAPK8, MAPK3, NOS3, KIT, IL8, IGF1, TNC, GSN, GJA1, FN1, AKT1, F3, ENG, EGF, CTNNB1</i>                                                          |
| Positive regulation of cell migration                    | 18                 | 255                   | 1.66E-11                         | <i>VEGFA, THBS1, TGFB1, BMP2, SOD2, PLAU, MMP14, MMP9, KIT, IGF1, HSPA5, FLT1, F3, EGFR, EGF, EDNI, COL18A1, COL1A1</i>                                                                                   |
| Aging                                                    | 15                 | 178                   | 1.57E-10                         | <i>CAT, CALCA, TIMP2, TIMP1, TGFB2, TGFB3, SOD1, MAPK3, SERPINF1, APEX1, GSN, FOS, AKT1, AGT, DCN</i>                                                                                                     |
| Cellular protein metabolic process                       | 16                 | 226                   | 3.55E-10                         | <i>CALCA, TIMP1, TGFBI, TF, MMP2, MMP1, KNG1, IGF2, IGF1, APOA1, TNC, GSN, FNI, ALB, FBNI, VCAN</i>                                                                                                       |
| Regulation of blood pressure                             | 10                 | 63                    | 1.50E-09                         | <i>CD34, CALCA, SOD2, SOD1, REN, NOS3, AGT, EDNI, ACE, COL1A2</i>                                                                                                                                         |
| Positive regulation of MAP kinase activity               | 10                 | 63                    | 1.50E-09                         | <i>VEGFA, TNF, TGFB1, KIT, GHI, FLT1, FGF2, EGFR, EGF, EDNI</i>                                                                                                                                           |
| Response to estradiol                                    | 12                 | 111                   | 1.51E-09                         | <i>CDKN1B, CD4, CAT, TGFB1, PTCH1, PCNA, GJA1, GHI, AGT, EGFR, CTNNB1, COL1A1</i>                                                                                                                         |
| Extracellular matrix disassembly                         | 10                 | 67                    | 2.69E-09                         | <i>CD44, TIMP2, TIMP1, MMP14, MMP9, MMP3, MMP2, MMP1, GSN, ENG</i>                                                                                                                                        |
| Positive regulation of peptidyl-tyrosine phosphorylation | 11                 | 92                    | 2.93E-09                         | <i>CD44, CD4, VTN, VEGFA, TGFB1, IGF2, IGF1, ICAM1, GHI, AGT, EGF</i>                                                                                                                                     |
| Cellular response to growth factor stimulus              | 10                 | 69                    | 3.26E-09                         | <i>CAT, TWIST1, THBS1, TGFB2, SPARC, BMP2, NOS1, AKT1, EGFR, CTNNB1</i>                                                                                                                                   |
| Kidney development                                       | 12                 | 122                   | 3.28E-09                         | <i>CAT, VEGFA, TGFB2, SHH, BCL2, REN, SERPINF1, FBNI, AGT, ACE, DCN, CTNNB1</i>                                                                                                                           |
| Cell adhesion                                            | 23                 | 655                   | 5.32E-09                         | <i>MMRN1, CDH1, CD44, CD34, CD4, VWF, VTN, VCAM1, THBS1, TGFBI, PVR, NID1, ACHE, ITGAL, IL2, ICAM1, TNC, GP1BA, FNI, ENG, COL18A1, CTNNB1, VCAN</i>                                                       |

|                                                             |    |     |          |                                                                                                                                        |
|-------------------------------------------------------------|----|-----|----------|----------------------------------------------------------------------------------------------------------------------------------------|
| Heart development                                           | 15 | 248 | 1.01E-08 | <i>CDKN1B, CDKN1A, TGFB2, TGFB2, TGFB1, SPARC, BMP2, SHH, PCNA, GJA1, FN1, FBN1, ENG, EDN1, CTNNB1</i>                                 |
| Cellular response to cadmium ion                            | 8  | 38  | 1.19E-08 | <i>SOD1, MAPK8, MAPK3, MMP9, GSN, FOS, AKT1, EGFR</i>                                                                                  |
| Response to mechanical stimulus                             | 9  | 65  | 4.01E-08 | <i>THBS1, TGFB2, PTCH1, MAPK8, MMP14, TNC, FOS, DCN, COL1A1</i>                                                                        |
| Positive regulation of angiogenesis                         | 12 | 156 | 4.35E-08 | <i>CD34, VEGFA, TWIST1, THBS1, TGFB2, SERPINE1, NOS3, IL8, FLT1, FGF2, F3, ENG</i>                                                     |
| Skeletal system development                                 | 12 | 155 | 4.36E-08 | <i>TGFB2, BMP2, MMP14, MMP9, IGF2, IGF1, FBN1, EDN1, CTNNB1, VCAN, COL1A2, COL1A1</i>                                                  |
| Negative regulation of apoptotic process                    | 20 | 547 | 4.51E-08 | <i>CDKN1B, CDKN1A, CD44, CAT, VEGFA, TWIST1, TIMP1, THBS1, SOD1, SHH, BCL2, MAPK8, MMP9, IL2, IGF1, HSPA5, ALB, AKT1, EGFR, CTNNB1</i> |
| Positive regulation of epithelial to mesenchymal transition | 8  | 46  | 5.01E-08 | <i>TWIST1, TGFB2, TGFB3, TGFB2, TGFB1, BMP2, CTNNB1, COL1A1</i>                                                                        |
| Positive regulation of cell division                        | 8  | 48  | 6.69E-08 | <i>CAT, VEGFA, TGFB3, TGFB2, TGFB1, SHH, IGF2, FGF2</i>                                                                                |
| Activation of MAPK activity                                 | 11 | 128 | 6.74E-08 | <i>TNF, THBS1, TGFB3, BMP2, SOD1, MAPK3, KIT, IGF1, FGF2, AGT, EGF</i>                                                                 |

Table S3. Summary of Kyoto Encyclopedia of Genes and Genomes (KEGG) pathway gene set enrichment analysis.

| Process                                              | Genes in query set | Total genes in genome | Corrected hypergeometric P value | Genes                                                                                                                                                                                                                   |
|------------------------------------------------------|--------------------|-----------------------|----------------------------------|-------------------------------------------------------------------------------------------------------------------------------------------------------------------------------------------------------------------------|
| AGE-RAGE signaling pathway in diabetic complications | 23                 | 100                   | 1.04E-22                         | <i>CDKN1B, VEGFA, VCAM1, TNF, TGFBR2, TGFB3, TGFB2, TGFB1, BCL2, MAPK8, MAPK3, SERPINE1, NOS3, MMP2, IL8, ICAM1, FN1, AKT1, F3, AGT, EDN1, COL1A2, COL1A1</i>                                                           |
| Proteoglycans in cancer                              | 26                 | 205                   | 3.04E-19                         | <i>CDKN1A, CD44, VTN, VEGFA, TWIST1, TNF, THBS1, TGFB2, TGFB1, SHH, PTCH1, MAPK3, PLAU, MMP9, MMP2, LUM, IGF2, IGF1, FN1, FGF2, AKT1, EGFR, DCN, CTNNB1, COL1A2, COL1A1</i>                                             |
| Pathways in cancer                                   | 34                 | 531                   | 1.88E-16                         | <i>CDKN1B, CDKN1A, CDH1, VEGFA, TGFBR2, TGFB3, TGFB2, TGFB1, BMP2, SHH, BCL2, PTCH1, MAPK8, MAPK3, NOS2, MMP9, MMP2, MMP1, MAX, KNG1, KIT, IL8, IL2, IGF2, IGF1, FOS, FN1, FGF2, AKT1, AGT, EGFR, EGF, EDN1, CTNNB1</i> |
| HIF-1 signaling pathway                              | 16                 | 109                   | 1.17E-12                         | <i>CDKN1B, CDKN1A, VEGFA, TIMP1, TF, BCL2, MAPK3, SERPINE1, NOS3, NOS2, IGF1, FLT1, AKT1, EGFR, EGF, EDN1</i>                                                                                                           |
| Relaxin signaling pathway                            | 17                 | 129                   | 1.34E-12                         | <i>VEGFA, TGFBR2, TGFB1, MAPK8, MAPK3, NOS3, NOS2, NOS1, MMP9, MMP2, MMP1, FOS, AKT1, EGFR, EDN1, COL1A2, COL1A1</i>                                                                                                    |
| Chagas disease                                       | 15                 | 102                   | 6.57E-12                         | <i>TNF, TGFBR2, TGFB3, TGFB2, TGFB1, MAPK8, MAPK3, SERPINE1, NOS2, KNG1, IL8, IL2, FOS, AKT1, ACE</i>                                                                                                                   |
| Bladder cancer                                       | 11                 | 41                    | 1.05E-11                         | <i>CDKN1A, CDH1, VEGFA, THBS1, MAPK3, MMP9, MMP2, MMP1, IL8, EGFR, EGF</i>                                                                                                                                              |
| PI3K-Akt signaling pathway                           | 23                 | 354                   | 5.42E-11                         | <i>CDKN1B, CDKN1A, VWF, VTN, VEGFA, THBS1, BCL2, MAPK3, NOS3, KIT, IL2, IGF2, IGF1, TNC, GHI, FN1, FLT1, FGF2, AKT1, EGFR, EGF, COL1A2, COL1A1</i>                                                                      |
| Colorectal cancer                                    | 13                 | 86                    | 1.41E-10                         | <i>CDKN1A, TGFBR2, TGFB3, TGFB2, TGFB1, BCL2, MAPK8, MAPK3, FOS, AKT1, EGFR, EGF, CTNNB1</i>                                                                                                                            |
| Prostate cancer                                      | 13                 | 97                    | 6.18E-10                         | <i>CDKN1B, CDKN1A, BCL2, MAPK3, PLAU, PLAT, MMP9, MMP3, IGF1, AKT1, EGFR, EGF, CTNNB1</i>                                                                                                                               |
| Focal adhesion                                       | 17                 | 201                   | 7.47E-10                         | <i>VWF, VTN, VEGFA, THBS1, BCL2, MAPK8, MAPK3, IGF1, TNC, FN1, FLT1, AKT1, EGFR, EGF, CTNNB1, COL1A2, COL1A1</i>                                                                                                        |
| Gastric cancer                                       | 15                 | 149                   | 9.16E-10                         | <i>CDKN1B, CDKN1A, CDH1, TGFBR2, TGFB3, TGFB2, TGFB1, SHH, BCL2, MAPK3, FGF2, AKT1, EGFR, EGF, CTNNB1</i>                                                                                                               |
| FoxO signaling pathway                               | 14                 | 131                   | 1.761E-09                        | <i>CDKN1B, CDKN1A, CAT, TGFBR2, TGFB3, TGFB2, TGFB1, SOD2, MAPK8, MAPK3, IGF1, AKT1, EGFR, EGF</i>                                                                                                                      |
| Fluid shear stress and atherosclerosis               | 14                 | 139                   | 3.65E-09                         | <i>VEGFA, VCAM1, TNF, BCL2, MAPK8, PLAT, NOS3, MMP9, MMP2, ICAM1, FOS, AKT1, EDN1, CTNNB1</i>                                                                                                                           |
| Rheumatoid arthritis                                 | 12                 | 93                    | 3.967E-09                        | <i>VEGFA, TNF, TGFB3, TGFB2, TGFB1, MMP3, MMP1, ITGAL, IL8, ICAM1, FOS, FLT1</i>                                                                                                                                        |
| Pancreatic cancer                                    | 11                 | 76                    | 6.112E-09                        | <i>CDKN1A, VEGFA, TGFBR2, TGFB3, TGFB2, TGFB1, MAPK8, MAPK3, AKT1, EGFR, EGF</i>                                                                                                                                        |
| Hepatitis B                                          | 14                 | 162                   | 2.3154E-08                       | <i>CDKN1A, TNF, TGFBR2, TGFB3, TGFB2, TGFB1, BCL2, MAPK8, MAPK3, PCNA, MMP9, IL8, FOS, AKT1</i>                                                                                                                         |
| MAPK signaling pathway                               | 18                 | 294                   | 2.3289E-08                       | <i>VEGFA, TNF, TGFBR2, TGFB3, TGFB2, TGFB1, MAPK8, MAPK3, MAX, KIT, IGF2, IGF1, FOS, FLT1, FGF2, AKT1, EGFR, EGF</i>                                                                                                    |
| Malaria                                              | 9                  | 50                    | 2.9003E-08                       | <i>VCAM1, TNF, THBS1, TGFB3, TGFB2, TGFB1, ITGAL, IL8, ICAM1</i>                                                                                                                                                        |
| Endocrine resistance                                 | 11                 | 98                    | 7.869E-08                        | <i>CDKN1B, CDKN1A, BCL2, MAPK8, MAPK3, MMP9, MMP2, IGF1, FOS, AKT1, EGFR</i>                                                                                                                                            |
